# Supplementary material
Source: publisher figshare collection journal article supplement (https://acs.figshare.com/ndownloader/files/4151044)
Supplement: Supplementary file 1 [file 4151044]

# **Supporting Information**

## **Ta<sub>2</sub>O<sub>5</sub> Nanotubes Obtained by Anodization: Effect of Thermal Treatment on the Photocatalytic Activity for Hydrogen Production**

Renato V. Gonçalves, Pedro Migowski, Heberton Wender, Dario Eberhardt, Daniel E. Weibel, Flávia C. Sonaglio, Maximiliano J. M. Zapata, Jairton Dupont, Adriano F. Feil and Sergio R. Teixeira

Figure S1

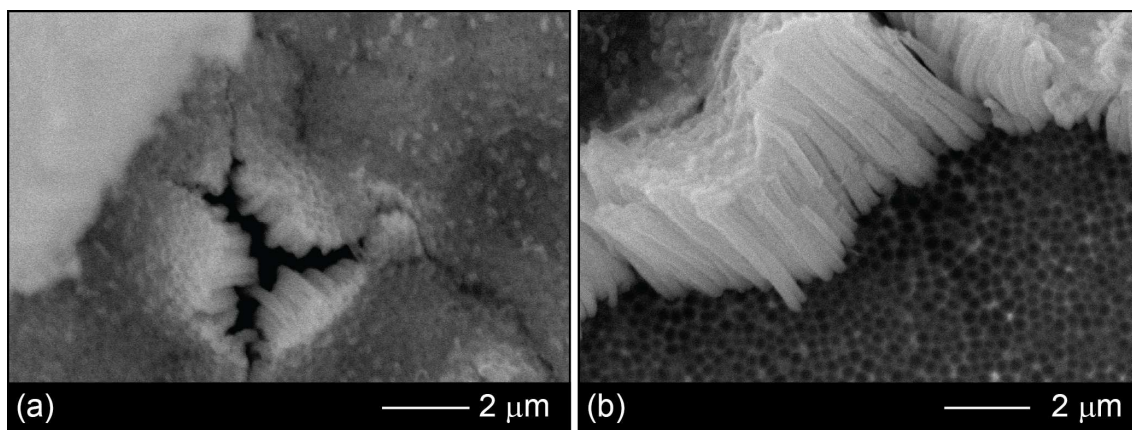

Figure S1. (a) SEM top-view and (b) cross-section images of  $\text{Ta}_2\text{O}_5$  nanotubes anodized in  $\text{H}_2\text{SO}_4 + 1\% \text{ HF} + 4\% \text{ water (D.I.)}$  at 50 V for 20 min in room temperature.

Figure S2 show the cross-sectional SEM images of Ta<sub>2</sub>O<sub>5</sub> NTs obtained after 20 min anodization at 50 V at different temperatures. At all electrolyte temperatures, Ta<sub>2</sub>O<sub>5</sub> NTs were vertically oriented and self-organized.

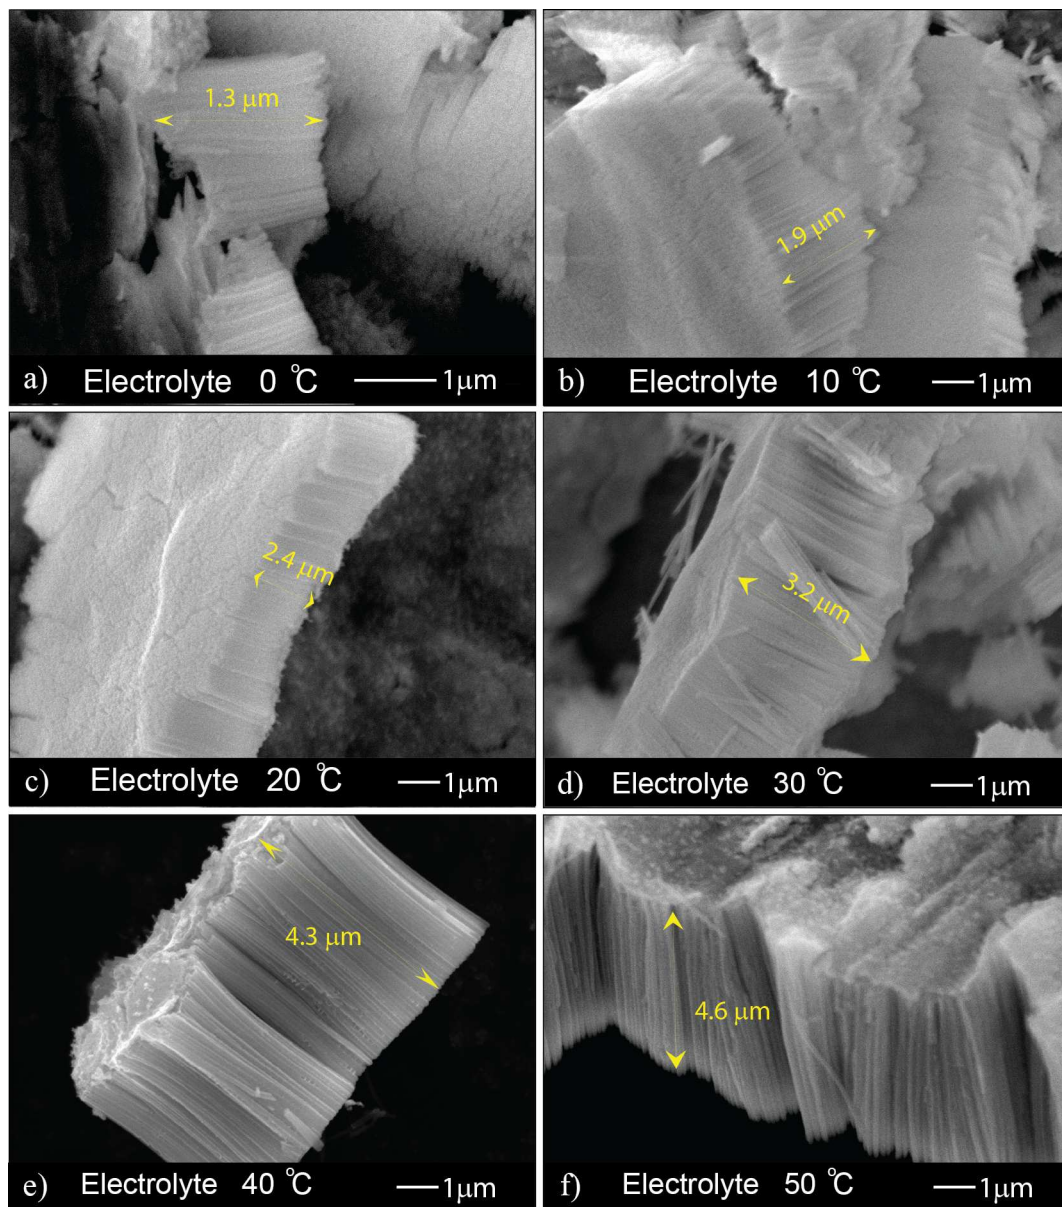

Figure S2. SEM cross-section images of Ta<sub>2</sub>O<sub>5</sub> NTs prepared by anodization at 50 V with different electrolyte temperatures: (a) 0 °C, (b) 10 °C, (c) 20 °C, (d) 30 °C, (e) 40 °C and (f) 50 °C.

Table S1: Sulfur concentration percent measured by Energy Dispersive X-ray Spectroscopy (EDX) to compare the crystallization of the freestanding Ta<sub>2</sub>O<sub>5</sub> NTs prepared at 50 °C anodization electrolyte after different annealing temperatures in Air atmosphere for 30 min.

| Ta <sub>2</sub> O <sub>5</sub> NTs | Annealing temperature (°C) | Sulfur concentration (atom. %) |
|------------------------------------|----------------------------|--------------------------------|
| Freestanding                       | 550                        | 6.0                            |
|                                    | 750                        | 3.0                            |
|                                    | 800                        | 1.4                            |
|                                    | 800 <sup>a</sup>           | >0.5                           |

<sup>a</sup>The photocatalyst was annealed for 1 h at 800 °C in Air atmosphere
